# Supplementary material for: CK1ε drives osteogenic differentiation of bone marrow mesenchymal stem cells via activating Wnt/β-catenin pathway
Source: publisher site journal article supplement (doi:10.18632/aging.205067), 2023-10-02
Supplement: Supplementary file [file aging-v15i19-205067-supplementary-material-SD1.pdf]

## SUPPLEMENTARY FIGURES

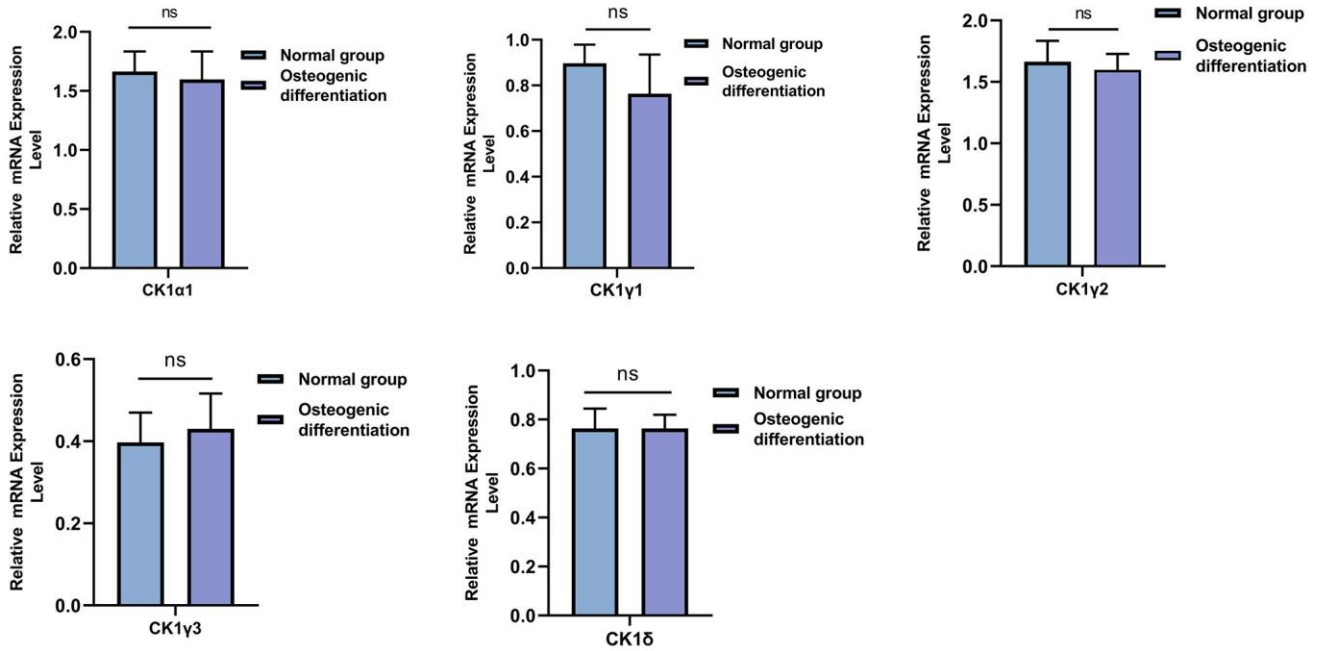

**Supplementary Figure 1. The related mRNA expression levels of CK1 family members were detected by qRT-PCR analysis, after two weeks of incubation ( $n = 3$ ). The experiments in this figure were repeated three times, and similar results were obtained. The student's  $t$ -test was used for statistical analysis. \* $P < 0.05$ ; \*\* $P < 0.01$ ; \*\*\* $P < 0.001$ ; Abbreviations: ns: not statistically significant.**

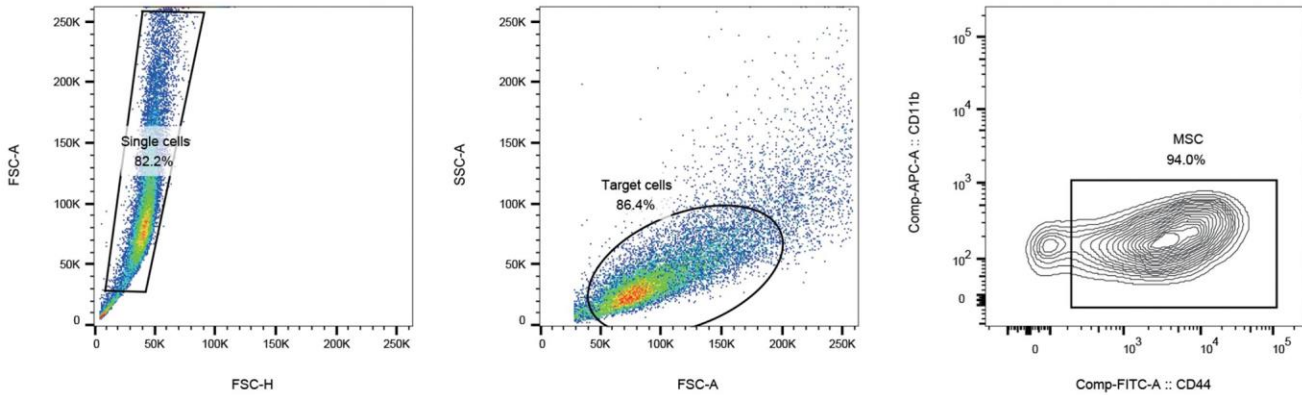

**Supplementary Figure 2. Identification of rat BMSCs. CD44 and CD11b (biomarkers of OD) were examined by flow cytometry.**

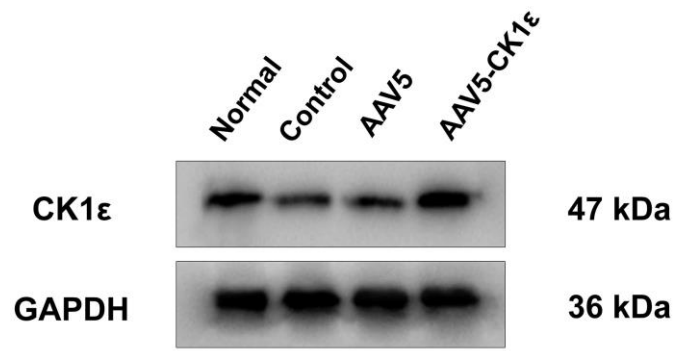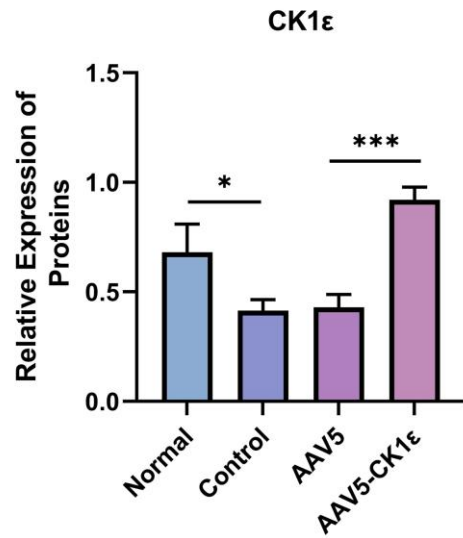

**Supplementary Figure 3. CK1ε relative protein expression level and quantitative analysis ( $n = 5$ ).** The data are presented as the means  $\pm$  SD of independent experiments. The one-way ANOVA was used. \* $P < 0.05$ ; \*\* $P < 0.01$ ; \*\*\* $P < 0.001$ ; Abbreviations: ns: not statistically significant.
